# Supplementary material
Source: PubMed Central journal article supplement (PMC3360078)

Supplementary Figure 1. Monitoring progression of in vitro selections.

Each graph shows the results of filter binding assays with RNAs from the indicated round of selection with the indicated protein. Relative binding indicates the percentage of input RNA bound.

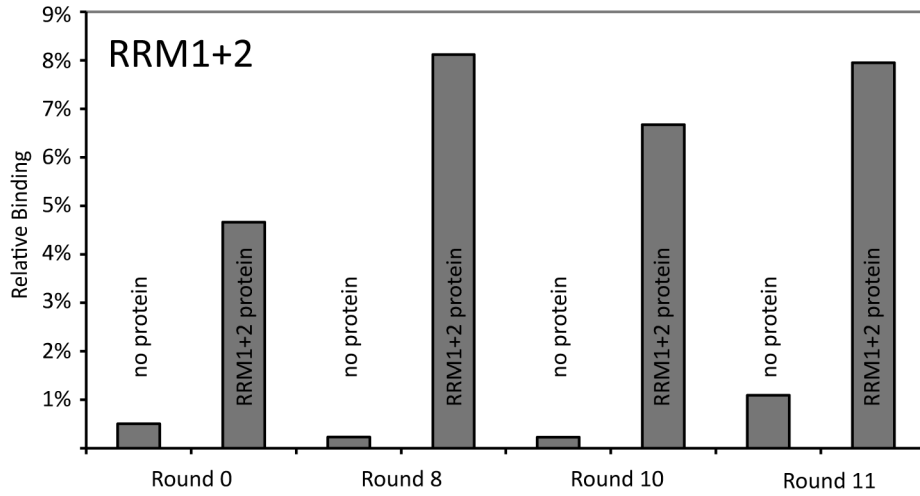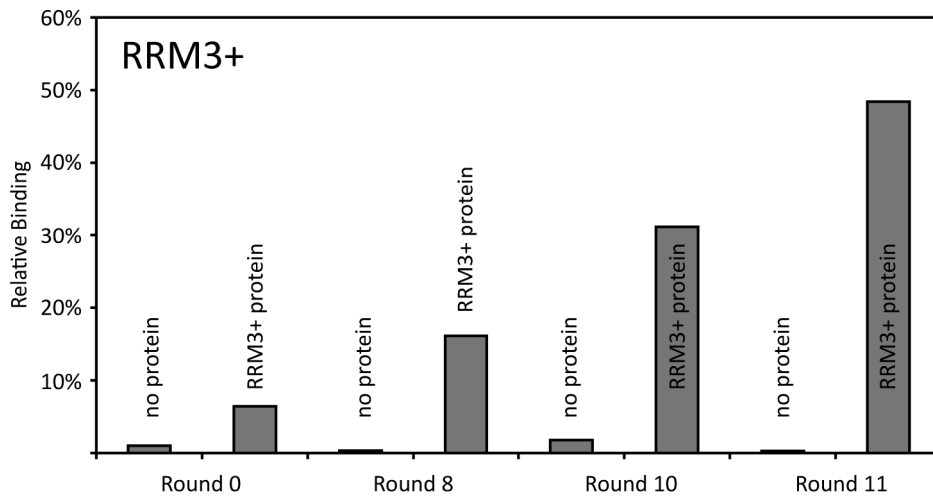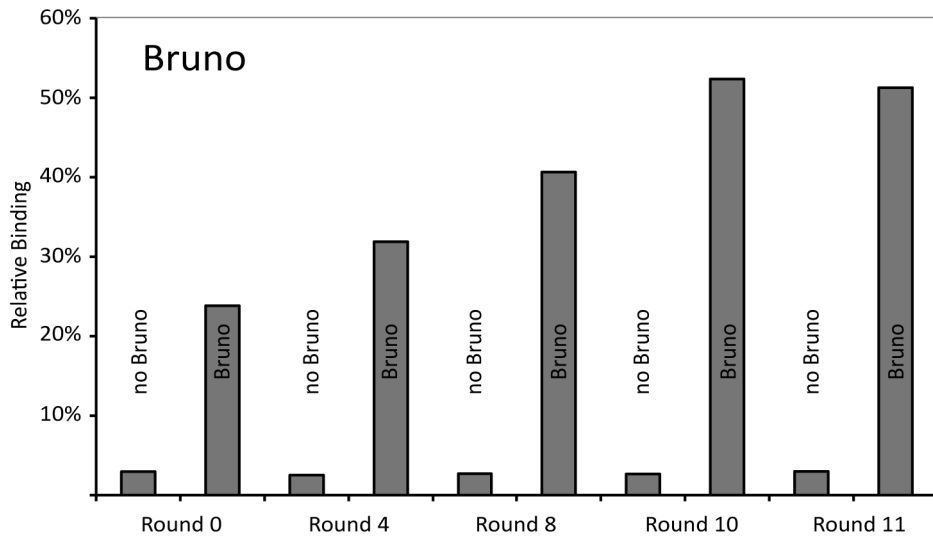

Supplementary Table 1. RRM1+2 aptamers

| aptamer | Aptamer sequence                                      |
|---------|-------------------------------------------------------|
| 8.2     | UUCUACAGGAUGUGGCAGUCGGAUUCCCAUAAUCCUUUCAUACCUAGCA     |
| 8.3     | UUUAAUCACUUACGAGAGAAUCAUUCUCUCAUACGAAUUUAUGCAAUGUA    |
| 8.4     | GCUUAUAGGUCAAAGCAACCAUUUAGUUCUACCGGACGGUUGGAAUUUAU    |
| 8.5     | UAUGUUUUGCAAGAGUUCAAAAAACUCAGCUUCUGUCUGCCUGGAGCUCUA   |
| 8.6     | GGAUCAUUCACAUA AAAAGGCUGAUCAAAGUGUUGUAUCUUUAUACCCUCAG |
| 8.7     | GGAUCAUUCACAUA AAAAGGCUGAUCAAAGUGUUGUAUCUUUAUACCCUCAG |
| 8.9     | GGAUCAUUCACAUA AAAAGGCUGAUCAAAGUGUUGUAUCUUUAUACCCUCGG |
| 8.10    | UAUGUUUUGCAAGAGUUCAAAAAACUCAGCUUCUGUCUGCCUGGAGCUCUA   |
| 8.11    | CUACGUAAAAUUUCUUGUGUAGUCACUUCUAAAGUCAGUAAGUGCAAUUC    |
| 8.12    | AAUUGCCAAUCCGUCACGACCGUJAGACCGGUAGUCUACAAUGUUUUGUAU   |
| 8.13    | AUGACGUACGCAUUUAUCUUUGUCGACGGUGUAUCACUUCUCUUUGCCC     |
| 8.14    | UAUGUUUUGCAAGAGUUCAAAAAACUCAGCUUCUGUCUGCCUGGAGCUCUA   |
| 8.15    | AUUUAGUAGUGAGGUCUCCAUAAGCCACGUUAUCCAGUACUUAUUUUAGU    |
| 8.17    | GUCUUGUUUUUAUGUUUUACACGAGUUUUAGAAACUCAAACUGGAAAGCGA   |
| 8.18    | GCAAAAGCCGGUCGCGCUAAGUAUAGCAUCAUUUCUCUAAGCAUAUGUAA    |
| 8.19    | UAUGUUUUGCAAGAGUUCAAAAAACUCAGCUUCUGUCUGCCUGGAGCUCUA   |
| 8.20    | UAUGUUUUGCAAGAGUUCAAAAAACUCAGCUUCUGUCUGCCUGGAGCUCUA   |
| 8.21    | CUACGUAAAAUUUCUUGUGUAGUCACUUCUAAAGUCAGUAAGUGCAAUUC    |
| 8.23    | UAUGUUUUGCAAGAGUUCAAGAAACUCAGCUUCUGUCUGCCUGGAGCUCUA   |
| 8.26    | AUUUAGUAGUGAGGUCUCCAUAAGCCACGUUAUCCAGUACUUAUUUUAGU    |
| 8.27    | GGAUCAUUCACAUA AAAAGGCUGAUCAAAGUGUUGUAUCUUUAUACCCUCAG |
| 8.28    | GGAUCAUUCACAUA AAAAGGCUGAUCAAAGUGUUGUAUCUUUAUACCCUCGG |
| 8.29    | AUUUAGUAGUGAGGUCUCCAUAAGCCACGUUAUCCAGUACUUAUUUUAGU    |
| 8.30    | AAUUAGCUCGAUACAUUAUAUUUUACCAAUCAUGCAGGAGUCGAUUUGU     |
| 8.31    | AUGACGCACGCAUUUAUCUUUGUCGACGGUGUAUCACUUCUCUUUGCCC     |
| 8.32    | GGAUCAUUCACAUA AAAAGGCUGAUCAAAGUGUUGCAUCUUUAUACCCUCA  |
| 8.33    | UAUGUUUUGCAAGAGUUCAAAAAACUCAGCUUCUGUCUGCCUGGAGCUCUA   |
| 8.34    | UUUAAUCACUUACGAGAGAAUCAUUCUCUCAUACGAAUUUAUGCAAUGUA    |
| 8.37    | GCUUAUAGGUCAAAGCAACCGUUUAGUUCUACCGGACGGUUGGAAUUUAU    |
| 8.39    | UAUGUUUUGCAAGAGUUCAAAAAACUCAGCUUCUGUCCGCCUGGAGCUCUA   |
| 8.45    | AUUUAGUAGUGAGGUCUCCAUAAGCCACGUUAUCCAGUACUUAUUUUAGU    |
| 8.46    | AGGUCUAAGCAGGAACGCCAAAACCUUGGAAUUAGCAUCCUUCUCAUA      |
| 8.50    | AGGAGGUUUUACAAACCGUUUGGACUAGCUUCUUUUCAAAAAUUACCCC     |

Supplementary Table 2. RRM3+ aptamers

| Aptamer | Aptamer sequence                                    |
|---------|-----------------------------------------------------|
| 4.1     | AUAUGAUUGCUGCAGUUCUUGAUUCCCUCAAAGUAAUCUGUCCACCUGGC  |
| 4.3     | GCUCAAGUUUCCUGUAGCAGGUUUCCTAAAAAUGAAUAGUUCUUCUUA    |
| 4.4     | GGGUUACUUUUGUGCUUGUAGACCAAAGUGUUGCCUCUACCCUCAACUA   |
| 4.5     | AUUAGUUCAGUACUCCCAAUGCUAAAUCGAUUUACCGAUACACCUUAGGA  |
| 4.8     | GCUCAAGUUUCCUGUAGCAGGUUUCCTAAAAAUGAAUAGUUCUUCUUA    |
| 4.11    | AAAACCUUCAUCCAAUUGCGUUACUAUGGUUUGAGAAAAGUCUUCGCU    |
| 4.12    | CCACUUAUUGAAAUAUAGCCUUGCAAACAAGGCCGUUUUGUGAUUGACAU  |
| 4.13    | UAUCUGGUUGAAAAGUUUCCGCAAAAGGCAUCGAAGGAUUAUAUCACAA   |
| 4.16    | GCUCAAGUUUCCUGUAGCAGGUUUCCTAAAAAUGAAUAGUUCUUCUUA    |
| 4.18    | AAUGGGCCAUAUUUJAGAUGAGCCAAAGUGUUGUAGAAUCUACUAACUUUU |
| 4.21    | CUGAUUCAGUAUGGGAUGGCUAUUACCGCCACUCCGAAGUGUUUUAUUGAU |
| 4.22    | UUCUAUCUGACUCGGAUUUUAUUGAUCUAUAUACCUUCAGGUGUUGUCAGA |
| 4.25    | CUGAUUCAGUAUGGGAUGGCUAUUACCGCCACUCCGAAGUGUUUUAUUGAU |
| 4.26    | UAGCUUCUUGCUAAAUGUUUAUUGACUCCUCUGUCUGAUGCAGGAGCUU   |
| 4.27    | UAAUCGAGGACAUAAGAGUUJGACUCCUCACCGGUACAGCCAGUCAUC    |
| 4.28    | UAGCUUCUUGCUAAAUGUUUAUUGACUCCUCUGUCUGAUGCAGGAGCUU   |
| 4.29    | GGGCCUACAAGCCAAAGUGUJGCGUCCACACAUUGGUUUAAUCACUCAAG  |
| 4.30    | GCUCAAGUUUCCUGUAGCAGGUUUCCTAAAAAUGAAUAGUUCUUCUUA    |
| 4.33    | AAUGGGCCAUAUUUJAGAUGAGCCAAAGUGUUGUAGAAUCUACUAACUUUU |
| 4.34    | CAGAUUCAGUAUGGGAUGGCUAUUACCGCCACUCCGAAGUGUUUUAUUGAU |
| 4.36    | GGGCCUACAAGCCAAAGUGUJGCGUCCACACAUUGGUUUAAUCACUCAAG  |
| 4.37    | UUUUAAAAGAUUCUCUGCAGUGGCGAGCAAAGCUAAACAAGCUUUUAUCAA |
| 4.38    | GCUCAAGUUUCCUGUAGCAGGUUUCCTAAAAAUGAAUAGUUCUUCUUA    |
| 4.39    | UAGCUUCUUGCUAAAUGUUUAUUGACUCCUCUGUCUGAUGCAGGAGCUU   |
| 4.40    | UAGCUUCUUGCUAAAUGUUUAUUGACUCCUCUGUCUGAUGCAGGAGCUU   |
| 4.42    | UAUCUGGUUGAAAAGUUUCCGCAAAAGGCAUCGAAGGAUUAUAUCACAA   |
| 4.45    | CCGUAAUUAUCUAUUCUACAGCUUAGACUCACGAAUUAUAUGUAUCAGCA  |
| 4.46    | CUGAUUCAGUAUGGGAUGGCUAUUACCGCCACUCCGAAGUGUUUUAUUGAU |
| 4.48    | GUCCAUAGCAAUUGCAGUUCGAUUCCTCACUAUGGCUAUACACUAGAA    |
| 4.49    | GCUCAAGUUUCCUGUAGCAGGUUUCCTAAAAAUGAAUAGUUCUUCUUA    |
| 4.50    | CUGAUUCAGUAUGGGAUGGCUAUUACCGCCACUCCGAAGUGUUUUAUUGAU |
| 4.51    | GCUCAAGUUUCCUGCAGCAGGUUUCCTAAAAAUGAAUAGUUCUUCUUA    |
| 4.54    | AAUGGGCCAUAUUUJAGAUGAGCCAAAGUGUUGUAGAAUCUACUAACUUUU |





Supplementary table 4. Tetranucleotides in the anti-RRM1+2 and anti-Bru aptamers

| tetranucleotide | RRM1+2<br>count | RRM1+2<br>rank | Bru<br>count | Bru<br>rank |
|-----------------|-----------------|----------------|--------------|-------------|
| aaaa            | 18              | 10t            | 3            | 181t        |
| aaac            | 12              | 32t            | 2            | 192t        |
| aaag            | 17              | 12t            | 3            | 181t        |
| aaat            | 9               | 60t            | 12           | 84t         |
| aaca            | 0               | 220t           | 4            | 180         |
| aacc            | 4               | 136t           | 10           | 95t         |
| aacg            | 1               | 192t           | 5            | 147t        |
| aact            | 10              | 49t            | 6            | 133t        |
| aaga            | 8               | 69t            | 0            | 241t        |
| aagc            | 6               | 101t           | 6            | 133t        |
| aagg            | 6               | 101t           | 1            | 218t        |
| aagt            | 9               | 60t            | 9            | 105t        |
| aata            | 0               | 220t           | 11           | 90t         |
| aatc            | 10              | 49t            | 15           | 74t         |
| aatg            | 3               | 155t           | 7            | 121t        |
| aatt            | 10              | 49t            | 35           | 32t         |
| acaa            | 2               | 172t           | 3            | 181t        |
| acac            | 1               | 192t           | 9            | 105t        |
| acag            | 1               | 192t           | 2            | 192t        |
| acat            | 7               | 90t            | 6            | 133t        |
| acca            | 3               | 155t           | 7            | 121t        |
| acc             | 1               | 192t           | 8            | 120         |
| accg            | 5               | 122t           | 6            | 133t        |
| acct            | 8               | 69t            | 25           | 51          |
| acga            | 6               | 101t           | 2            | 192t        |
| acgc            | 4               | 136t           | 3            | 181t        |
| acgg            | 5               | 122t           | 1            | 218t        |
| acgt            | 8               | 69t            | 9            | 105t        |
| acta            | 5               | 122t           | 7            | 121t        |
| actc            | 9               | 60t            | 13           | 77t         |
| actg            | 1               | 192t           | 10           | 95t         |
| actt            | 6               | 101t           | 12           | 84t         |
| agaa            | 3               | 155t           | 1            | 218t        |
| agac            | 1               | 192t           | 3            | 181t        |
| agag            | 10              | 49t            | 0            | 241t        |
| agat            | 0               | 220t           | 0            | 241t        |
| agca            | 7               | 90t            | 1            | 218t        |
| agcc            | 5               | 122t           | 7            | 121t        |
| agcg            | 1               | 192t           | 4            | 164t        |
| agct            | 18              | 10t            | 3            | 181t        |
| agga            | 4               | 136t           | 0            | 241t        |
| aggc            | 6               | 101t           | 2            | 192t        |
| aggg            | 0               | 220t           | 1            | 218t        |
| aggt            | 8               | 69t            | 2            | 192t        |
| agta            | 10              | 49t            | 5            | 147t        |
| agtc            | 5               | 122t           | 5            | 147t        |
| agtg            | 11              | 40t            | 5            | 147t        |

Supplementary table 4. Tetranucleotides in the anti-RRM1+2 and anti-Bru aptamers

|      |    |      |    |      |
|------|----|------|----|------|
| agtt | 11 | 40t  | 10 | 95t  |
| ataa | 8  | 69t  | 9  | 105t |
| atac | 4  | 136t | 10 | 95t  |
| atag | 7  | 90t  | 4  | 164t |
| atat | 8  | 69t  | 32 | 37t  |
| atca | 27 | 2    | 11 | 90t  |
| atcc | 7  | 90t  | 18 | 66t  |
| atcg | 0  | 220t | 7  | 121t |
| atct | 11 | 40t  | 29 | 42t  |
| atga | 3  | 155t | 3  | 181t |
| atgc | 11 | 40t  | 10 | 95t  |
| atgg | 0  | 220t | 2  | 192t |
| atgt | 14 | 21t  | 24 | 52t  |
| atta | 11 | 40t  | 24 | 52t  |
| attc | 8  | 69t  | 26 | 49t  |
| attg | 1  | 192t | 39 | 26t  |
| atth | 14 | 21t  | 71 | 14   |
| caaa | 23 | 4    | 5  | 147t |
| caac | 2  | 172t | 13 | 77t  |
| caag | 8  | 69t  | 2  | 192t |
| caat | 6  | 101t | 20 | 60t  |
| caca | 6  | 101t | 5  | 147t |
| cacc | 7  | 90t  | 12 | 84t  |
| cacg | 6  | 101t | 4  | 164t |
| cact | 6  | 101t | 9  | 105t |
| caga | 0  | 220t | 4  | 164t |
| cagc | 8  | 69t  | 2  | 192t |
| cagg | 3  | 155t | 2  | 192t |
| cagt | 6  | 101t | 9  | 105t |
| cata | 16 | 15t  | 17 | 69t  |
| catc | 2  | 172t | 12 | 84t  |
| catg | 1  | 192t | 7  | 121t |
| catt | 13 | 29t  | 26 | 49t  |
| ccaa | 3  | 155t | 20 | 60t  |
| ccac | 4  | 136t | 7  | 121t |
| ccag | 4  | 136t | 6  | 133t |
| ccat | 7  | 90t  | 33 | 36   |
| ccca | 1  | 192t | 19 | 63t  |
| cccc | 0  | 220t | 9  | 105t |
| cccg | 0  | 220t | 6  | 133t |
| ccct | 1  | 192t | 28 | 45   |
| ccga | 0  | 220t | 5  | 147t |
| ccgc | 0  | 220t | 9  | 105t |
| ccgg | 4  | 136t | 2  | 192t |
| ccgt | 3  | 155t | 23 | 55t  |
| ccta | 1  | 192t | 27 | 46t  |
| cctc | 6  | 101t | 43 | 23t  |
| cctg | 9  | 60t  | 20 | 60t  |
| cctt | 2  | 172t | 48 | 21   |



Supplementary table 4. Tetranucleotides in the anti-RRM1+2 and anti-Bru aptamers

|      |    |      |    |      |
|------|----|------|----|------|
| cgaa | 2  | 172t | 1  | 218t |
| cgac | 4  | 136t | 4  | 164t |
| cgag | 3  | 155t | 1  | 218t |
| cgat | 2  | 172t | 7  | 121t |
| cgca | 3  | 155t | 5  | 147t |
| cgcc | 1  | 192t | 8  | 117t |
| cgcg | 1  | 192t | 1  | 218t |
| cgct | 1  | 192t | 7  | 121t |
| cgga | 3  | 155t | 1  | 218t |
| cggc | 0  | 220t | 4  | 164t |
| cggg | 0  | 220t | 0  | 241t |
| cggt | 7  | 90t  | 1  | 218t |
| cgta | 4  | 136t | 9  | 105t |
| cgtc | 1  | 192t | 22 | 58   |
| cgtg | 0  | 220t | 8  | 117t |
| cgtt | 6  | 101t | 24 | 52t  |
| ctaa | 4  | 136t | 12 | 84t  |
| ctac | 5  | 122t | 19 | 63t  |
| ctag | 2  | 172t | 2  | 192t |
| ctat | 4  | 136t | 43 | 23t  |
| ctca | 12 | 32t  | 16 | 72t  |
| ctcc | 4  | 136t | 30 | 40t  |
| ctcg | 7  | 90t  | 17 | 69t  |
| ctct | 14 | 21t  | 52 | 19   |
| ctga | 6  | 101t | 4  | 164t |
| ctgc | 8  | 69t  | 13 | 77t  |
| ctgg | 10 | 49t  | 2  | 192t |
| ctgt | 8  | 69t  | 50 | 20   |
| ctta | 10 | 49t  | 18 | 66t  |
| cttc | 14 | 21t  | 38 | 28t  |
| cttg | 2  | 172t | 34 | 35   |
| cttt | 8  | 69t  | 75 | 11   |
| gaaa | 7  | 90t  | 1  | 230  |
| gaac | 1  | 192t | 2  | 192t |
| gaag | 0  | 220t | 0  | 241t |
| gaat | 2  | 172t | 3  | 181t |
| gaca | 0  | 220t | 2  | 192t |
| gacc | 2  | 172t | 8  | 117t |
| gacg | 8  | 69t  | 2  | 192t |
| gact | 1  | 192t | 1  | 218t |
| gaga | 2  | 172t | 0  | 241t |
| gagc | 8  | 69t  | 4  | 164t |
| gagg | 5  | 122t | 2  | 192t |
| gagt | 10 | 49t  | 1  | 218t |
| gata | 1  | 192t | 1  | 218t |
| gatc | 12 | 32t  | 4  | 164t |
| gatg | 1  | 192t | 2  | 192t |
| gatt | 2  | 172t | 5  | 147t |
| gcaa | 14 | 21t  | 2  | 192t |

Supplementary table 4. Tetranucleotides in the anti-RRM1+2 and anti-Bru aptamers

|      |    |      |    |      |
|------|----|------|----|------|
| gcac | 0  | 220t | 5  | 147t |
| gcag | 3  | 155t | 2  | 192t |
| gcat | 6  | 101t | 7  | 121t |
| gcca | 6  | 101t | 5  | 147t |
| gccc | 3  | 155t | 9  | 105t |
| gccg | 1  | 192t | 1  | 218t |
| gcct | 8  | 69t  | 13 | 77t  |
| gcga | 1  | 192t | 0  | 241t |
| gcgc | 1  | 192t | 5  | 147t |
| gcgg | 0  | 220t | 1  | 218t |
| gcgt | 0  | 220t | 1  | 218t |
| gcta | 1  | 192t | 6  | 133t |
| gctc | 9  | 60t  | 6  | 133t |
| gctg | 6  | 101t | 0  | 241t |
| gctt | 11 | 40t  | 10 | 95t  |
| ggaa | 5  | 122t | 0  | 241t |
| ggac | 3  | 155t | 1  | 218t |
| ggag | 10 | 49t  | 1  | 218t |
| ggat | 8  | 69t  | 1  | 218t |
| ggca | 0  | 220t | 4  | 164t |
| ggcc | 0  | 220t | 2  | 192t |
| ggcg | 0  | 220t | 0  | 241t |
| ggct | 6  | 101t | 1  | 220  |
| ggga | 0  | 220t | 2  | 192t |
| gggc | 0  | 220t | 1  | 218t |
| gggg | 0  | 220t | 2  | 192t |
| gggt | 0  | 220t | 4  | 164t |
| ggta | 2  | 172t | 0  | 241t |
| ggtc | 8  | 69t  | 4  | 164t |
| ggtg | 3  | 155t | 0  | 241t |
| ggtt | 2  | 172t | 6  | 133t |
| gtaa | 3  | 155t | 12 | 84t  |
| gtac | 7  | 90t  | 10 | 95t  |
| gtag | 6  | 101t | 0  | 241t |
| gtat | 12 | 32t  | 23 | 55t  |
| gtca | 5  | 122t | 5  | 147t |
| gtcc | 0  | 220t | 79 | 10   |
| gtcg | 6  | 101t | 2  | 192t |
| gtct | 15 | 19t  | 81 | 9    |
| gtga | 4  | 136t | 3  | 181t |
| gtgc | 2  | 172t | 6  | 133t |
| gtgg | 0  | 220t | 4  | 164t |
| gtgt | 11 | 40t  | 39 | 26t  |
| gtta | 13 | 29t  | 21 | 59   |
| gttc | 10 | 49t  | 13 | 77t  |
| gttg | 8  | 69t  | 15 | 74t  |
| gttt | 5  | 122t | 94 | 6    |
| taaa | 8  | 69t  | 11 | 90t  |
| taac | 0  | 220t | 10 | 95t  |

Supplementary table 4. Tetranucleotides in the anti-RRM1+2 and anti-Bru aptamers

|      |    |      |     |      |
|------|----|------|-----|------|
| taag | 4  | 136t | 13  | 77t  |
| taat | 6  | 101t | 29  | 42t  |
| taca | 5  | 122t | 9   | 105t |
| tacc | 4  | 136t | 19  | 63t  |
| tacg | 8  | 69t  | 5   | 147t |
| tact | 4  | 136t | 27  | 46t  |
| taga | 2  | 172t | 2   | 192t |
| tagc | 9  | 60t  | 5   | 147t |
| tagg | 4  | 136t | 0   | 241t |
| tagt | 12 | 32t  | 9   | 105t |
| tata | 11 | 40t  | 30  | 40t  |
| tatc | 22 | 5    | 35  | 32t  |
| tatg | 24 | 3    | 23  | 55t  |
| tatt | 9  | 60t  | 91  | 8    |
| tcaa | 20 | 6t   | 15  | 74t  |
| tcac | 20 | 6t   | 11  | 90t  |
| tcag | 9  | 60t  | 7   | 121t |
| tcat | 12 | 32t  | 17  | 69t  |
| tcca | 8  | 69t  | 36  | 31   |
| tccc | 2  | 172t | 37  | 30   |
| tccg | 1  | 192t | 27  | 46t  |
| tcct | 1  | 192t | 74  | 12t  |
| tcga | 5  | 122t | 6   | 133t |
| tcgc | 1  | 192t | 6   | 133t |
| tcgg | 7  | 90t  | 2   | 192t |
| tcgt | 0  | 220t | 32  | 37t  |
| tcta | 16 | 15t  | 38  | 28t  |
| tctc | 11 | 40t  | 60  | 17   |
| tctg | 16 | 15t  | 40  | 25   |
| tctt | 15 | 19t  | 92  | 7    |
| tgaa | 0  | 220t | 4   | 164t |
| tgac | 3  | 155t | 5   | 147t |
| tgag | 4  | 136t | 4   | 164t |
| tgat | 6  | 101t | 4   | 164t |
| tgca | 14 | 21t  | 6   | 133t |
| tgcc | 12 | 32t  | 11  | 90t  |
| tgcg | 0  | 220t | 2   | 192t |
| tgct | 2  | 172t | 13  | 77t  |
| tgga | 19 | 8t   | 1   | 218t |
| ggc  | 0  | 220t | 0   | 241t |
| ggg  | 0  | 220t | 6   | 133t |
| gggt | 0  | 220t | 3   | 181t |
| tgta | 14 | 21t  | 35  | 32t  |
| tgtc | 12 | 32t  | 137 | 3    |
| tgtg | 2  | 172t | 32  | 37t  |
| tgtt | 17 | 12t  | 103 | 5    |
| ttaa | 2  | 172t | 29  | 42t  |
| ttac | 5  | 122t | 16  | 72t  |
| ttag | 14 | 21t  | 10  | 95t  |

Supplementary table 4. Tetranucleotides in the anti-RRM1+2 and anti-Bru aptamers

|      |    |      |     |      |
|------|----|------|-----|------|
| ttat | 37 | 1    | 74  | 12t  |
| ttca | 17 | 12t  | 10  | 95t  |
| ttcc | 1  | 192t | 47  | 22   |
| ttcg | 0  | 220t | 18  | 66t  |
| ttct | 19 | 8t   | 66  | 15   |
| ttga | 0  | 220t | 7   | 121t |
| ttgc | 4  | 136t | 5   | 147t |
| ttgg | 3  | 155t | 3   | 181t |
| ttgt | 13 | 29t  | 196 | 1    |
| ttta | 16 | 15t  | 57  | 18   |
| tttc | 5  | 122t | 64  | 16   |
| tttg | 9  | 60t  | 124 | 4    |
| tttt | 10 | 49t  | 152 | 2    |

Count: number of times the sequence is present in the sequenced aptamers.  
 Rank: 1 indicates the most frequent tetranucleotide. Ties are indicated with a t.

Supplementary Table 5. Structural features of RNAs used for binding assays.

| Binding site <sup>a</sup> | $\Delta G^b$ | copy number <sup>c</sup> | size | # of base pairs in binding site |     |     |
|---------------------------|--------------|--------------------------|------|---------------------------------|-----|-----|
|                           |              |                          |      | G-C                             | A-U | G-U |
| UGUUUUUAUAUGU             | -19.9        | 1                        | 12   | 1                               | 4   | 3   |
|                           |              | 2                        |      | 0                               | 5   | 4   |
|                           |              | 3                        |      | 1                               | 6   | 4   |
|                           |              | 4                        |      | 1                               | 4   | 3   |
| CAAUUUUUAUAUGU            | -20.5        | 1                        | 13   | 1                               | 6   | 3   |
|                           |              | 2                        |      | 1                               | 8   | 2   |
|                           |              | 3                        |      | 1                               | 6   | 1   |
|                           |              | 4                        |      | 1                               | 7   | 3   |
| UGUUUGUAGU                | -25.6        | 1                        | 10   | 2                               | 2   | 0   |
|                           |              | 2                        |      | 1                               | 3   | 2   |
|                           |              | 3                        |      | 2                               | 4   | 0   |
|                           |              | 4                        |      | 2                               | 3   | 1   |
| UUGUCC                    | -24.0        | 1                        | 6    | 3                               | 1   | 1   |
|                           |              | 2                        |      | 1                               | 0   | 1   |
|                           |              | 3                        |      | 0                               | 0   | 0   |
|                           |              | 4                        |      | 3                               | 3   | 0   |
| UAAAGUCUUCUA              | -24.3        | 1                        | 12   | 1                               | 6   | 0   |
|                           |              | 2                        |      | 0                               | 5   | 0   |
|                           |              | 3                        |      | 2                               | 7   | 1   |
|                           |              | 4                        |      | 1                               | 5   | 1   |
| UCAAUUGCAGU               | -36.1        | 1                        | 11   | 3                               | 6   | 2   |
|                           |              | 2                        |      | 3                               | 6   | 2   |
|                           |              | 3                        |      | 3                               | 5   | 2   |
|                           |              | 4                        |      | 3                               | 5   | 2   |

<sup>a</sup> The binding site that is present in four copies in the RNA used for binding assays (and inserted into a reporter transgene for in vivo assays).

<sup>b</sup> Predicted  $\Delta G$  for folding of entire RNA.

<sup>c</sup> Copy number refers to position of individual binding sites within the RNA.

Supplementary Table 1. RRM1+2 aptamers

| aptamer | Aptamer sequence                                      |
|---------|-------------------------------------------------------|
| 8.2     | UUCUACAGGAUGUGGCAGUCGGAUUCCCAUAAUCCUUUCAUACCUAGCA     |
| 8.3     | UUUAAUCACUUACGAGAGAAUCAUUCUCUCAUACGAAUUUAUGCAAUGUA    |
| 8.4     | GCUUAUAGGUCAAAGCAACCAUUUAGUUCUACCGGACGGUUGGAAUUUAU    |
| 8.5     | UAUGUUUUGCAAGAGUUCAAAAAACUCAGCUUCUGUCUGCCUGGAGCUCUA   |
| 8.6     | GGAUCAUUCACAUA AAAAGGCUGAUCAAAGUGUUGUAUCUUUAUACCCUCAG |
| 8.7     | GGAUCAUUCACAUA AAAAGGCUGAUCAAAGUGUUGUAUCUUUAUACCCUCAG |
| 8.9     | GGAUCAUUCACAUA AAAAGGCUGAUCAAAGUGUUGUAUCUUUAUACCCUCGG |
| 8.10    | UAUGUUUUGCAAGAGUUCAAAAAACUCAGCUUCUGUCUGCCUGGAGCUCUA   |
| 8.11    | CUACGUAAAAUUUCUUGUGUAGUCACUUCUAAAGUCAGUAAGUGCAAUUC    |
| 8.12    | AAUUGCCAAUCCGUCACGACCGUJAGACCGGUAGUCUACAAUGUUUUGUAU   |
| 8.13    | AUGACGUACGCAUUUAUCUUUGUCGACGGUGUAUCACUUCUCUUUGCCC     |
| 8.14    | UAUGUUUUGCAAGAGUUCAAAAAACUCAGCUUCUGUCUGCCUGGAGCUCUA   |
| 8.15    | AUUUAGUAGUGAGGUCUCCAUAAGCCACGUUAUCCAGUACUUAUUUUAGU    |
| 8.17    | GUCUUGUUUUUAUGUUUUACACGAGUUUUAGAAACUCAACUGGAAAGCGA    |
| 8.18    | GCAAAAGCCGGUCGCGCUAAGUAUAGCAUCAUUUCUCUAAGCAUAUGUAA    |
| 8.19    | UAUGUUUUGCAAGAGUUCAAAAAACUCAGCUUCUGUCUGCCUGGAGCUCUA   |
| 8.20    | UAUGUUUUGCAAGAGUUCAAAAAACUCAGCUUCUGUCUGCCUGGAGCUCUA   |
| 8.21    | CUACGUAAAAUUUCUUGUGUAGUCACUUCUAAAGUCAGUAAGUGCAAUUC    |
| 8.23    | UAUGUUUUGCAAGAGUUCAAGAAACUCAGCUUCUGUCUGCCUGGAGCUCUA   |
| 8.26    | AUUUAGUAGUGAGGUCUCCAUAAGCCACGUUAUCCAGUACUUAUUUUAGU    |
| 8.27    | GGAUCAUUCACAUA AAAAGGCUGAUCAAAGUGUUGUAUCUUUAUACCCUCAG |
| 8.28    | GGAUCAUUCACAUA AAAAGGCUGAUCAAAGUGUUGUAUCUUUAUACCCUCGG |
| 8.29    | AUUUAGUAGUGAGGUCUCCAUAAGCCACGUUAUCCAGUACUUAUUUUAGU    |
| 8.30    | AAUUAGCUCGAUACAUUAUAUUUUACCAAUCAUGCAGGAGUCGAUUUGU     |
| 8.31    | AUGACGCACGCAUUUAUCUUUGUCGACGGUGUAUCACUUCUCUUUGCCC     |
| 8.32    | GGAUCAUUCACAUA AAAAGGCUGAUCAAAGUGUUGCAUCUUUAUACCCUCA  |
| 8.33    | UAUGUUUUGCAAGAGUUCAAAAAACUCAGCUUCUGUCUGCCUGGAGCUCUA   |
| 8.34    | UUUAAUCACUUACGAGAGAAUCAUUCUCUCAUACGAAUUUAUGCAAUGUA    |
| 8.37    | GCUUAUAGGUCAAAGCAACCGUUUAGUUCUACCGGACGGUUGGAAUUUAU    |
| 8.39    | UAUGUUUUGCAAGAGUUCAAAAAACUCAGCUUCUGUCCGCCUGGAGCUCUA   |
| 8.45    | AUUUAGUAGUGAGGUCUCCAUAAGCCACGUUAUCCAGUACUUAUUUUAGU    |
| 8.46    | AGGUCUAAGCAGGAACGCCAAAACCUUGGAAUUAGCAUCCUUCUCAUA      |
| 8.50    | AGGAGGUUUUACAAACCGUUUGGACUAGCUUCUUUUCAAAAAUUACCCC     |

Supplementary Table 2. RRM3+ aptamers

| Aptamer | Aptamer sequence                                     |
|---------|------------------------------------------------------|
| 4.1     | AUAUGAUUGCUGCAGUUCUUGAUUCCCUCAAAGUAAUCUGUCCACCUGGC   |
| 4.3     | GCUCAAGUUUCCUGUAGCAGGUUCCCAAAAUGAAUAGUUCUUCUUA       |
| 4.4     | GGGUUACUUUUGUGCUUGUAGACCAAAGUGUUGCCUCUACCCUCAACUA    |
| 4.5     | AUUAGUUCAGUACUCCCAAUGCUAAAUCGAUUUACCGAUACACCUUAGGA   |
| 4.8     | GCUCAAGUUUCCUGUAGCAGGUUCCCAAAAUGAAUAGUUCUUCUUA       |
| 4.11    | AAAACCUUCAUCCAAUUGCGUUACUAUGGUUUGAGAAAAGUCUCCGCUC    |
| 4.12    | CCACUUAUUGAAAUAUAGCCUUGCAAACAAGGCCGUUUUGUGAUUGACAU   |
| 4.13    | UAUCUGGUUGAAAAGUUUCCGCAAAAGGCAUCGAAGGAUUAUAUCACAA    |
| 4.16    | GCUCAAGUUUCCUGUAGCAGGUUCCCAAAAUGAAUAGUUCUUCUUA       |
| 4.18    | AAUGGGCCAUAUUUJAGAUGAGCCAAAGUGUUGUAGAAUCUACUAACUUUU  |
| 4.21    | CUGAUUCAGUAUGGGAUGGCUAUUACCGCCACUCCGAAGUGUUUUAUUGAU  |
| 4.22    | UUCUAUCUGACUCGGAUUUUAUGAUCAUUAUCCUCAGGUGUUGUCAGA     |
| 4.25    | CUGAUUCAGUAUGGGAUGGCUAUUACCGCCACUCCGAAGUGUUUUAUUGAU  |
| 4.26    | UAGCUUCUUGC UAAAUGUUUAUAGACUCCUCUGUCUGAUGCAGGAGCUU   |
| 4.27    | UAAUCGAGGACAUAAGAGUUJG CAGUCCUCACCGGUACAGCCAGUCAUC   |
| 4.28    | UAGCUUCUUGC UAAAUGUUUAUAGACUCCUCUGUCUGAUGCAGGAGCUU   |
| 4.29    | GGGCCUACAAGCCAAAGUGUJGCGUCCACACAUUGGUUUAAUCACUCAAG   |
| 4.30    | GCUCAAGUUUCCUGUAGCAGGUUCCUAAAAUGAAUAGUUCUUCUUA       |
| 4.33    | AAUGGGCCAUAUUUJAGAUGAGCCAAAGUGUUGUAGAAUCUACUAACUUUU  |
| 4.34    | CAGAUUCAGUAUGGGAUGGCUAUUACCGCCACUCCGAAGUGUUUUAUUGAU  |
| 4.36    | GGGCCUACAAGCCAAAGUGUJGCGUCCACACAUUGGUUUAAUCACUCAAG   |
| 4.37    | UUUUAAAAGAUUCUCUGCAGUGUGCGAGCAAAGCUAAACAAGCUUUUAUCAA |
| 4.38    | GCUCAAGUUUCCUGUAGCAGGUUCCCAAAAUGAAUAGUUCUUCUUA       |
| 4.39    | UAGCUUCUUGC UAAAUGUUUAUAGACUCCUCUGUCUGAUGCAGGAGCUU   |
| 4.40    | UAGCUUCUUGC UAAAUGUUUAUAGACUCCUCUGUCUGAUGCAGGAGCUU   |
| 4.42    | UAUCUGGUUGAAAAGUUUCCGCAAAAGGCAUCGAAGGAUUAUAUCACAA    |
| 4.45    | CCGUAAUUAUCUAUUCUACAGCUUAGACUCACGAAUUAUAUGUAUCAGCA   |
| 4.46    | CUGAUUCAGUAUGGGAUGGCUAUUACCGCCACUCCGAAGUGUUUUAUUGAU  |
| 4.48    | GUCCAUAGCAAUUGCAGUUCGAUUCACACUAUGGCUAUACACUAGAA      |
| 4.49    | GCUCAAGUUUCCUGUAGCAGGUUCCCAAAAUGAAUAGUUCUUCUUA       |
| 4.50    | CUGAUUCAGUAUGGGAUGGCUAUUACCGCCACUCCGAAGUGUUUUAUUGAU  |
| 4.51    | GCUCAAGUUUCCUGCAGCAGGUUCCCAAAAUGAAUAGUUCUUCUUA       |
| 4.54    | AAUGGGCCAUAUUUJAGAUGAGCCAAAGUGUUGUAGAAUCUACUAACUUUU  |







Supplementary table 4. Tetranucleotides in the anti-RRM1+2 and anti-Bru aptamers

| tetranucleotide | RRM1+2<br>count | RRM1+2<br>rank | Bru<br>count | Bru<br>rank |
|-----------------|-----------------|----------------|--------------|-------------|
| aaaa            | 18              | 10t            | 3            | 181t        |
| aaac            | 12              | 32t            | 2            | 192t        |
| aaag            | 17              | 12t            | 3            | 181t        |
| aaat            | 9               | 60t            | 12           | 84t         |
| aaca            | 0               | 220t           | 4            | 180         |
| aacc            | 4               | 136t           | 10           | 95t         |
| aacg            | 1               | 192t           | 5            | 147t        |
| aact            | 10              | 49t            | 6            | 133t        |
| aaga            | 8               | 69t            | 0            | 241t        |
| aagc            | 6               | 101t           | 6            | 133t        |
| aagg            | 6               | 101t           | 1            | 218t        |
| aagt            | 9               | 60t            | 9            | 105t        |
| aata            | 0               | 220t           | 11           | 90t         |
| aatc            | 10              | 49t            | 15           | 74t         |
| aatg            | 3               | 155t           | 7            | 121t        |
| aatt            | 10              | 49t            | 35           | 32t         |
| acaa            | 2               | 172t           | 3            | 181t        |
| acac            | 1               | 192t           | 9            | 105t        |
| acag            | 1               | 192t           | 2            | 192t        |
| acat            | 7               | 90t            | 6            | 133t        |
| acca            | 3               | 155t           | 7            | 121t        |
| accc            | 1               | 192t           | 8            | 120         |
| accg            | 5               | 122t           | 6            | 133t        |
| acct            | 8               | 69t            | 25           | 51          |
| acga            | 6               | 101t           | 2            | 192t        |
| acgc            | 4               | 136t           | 3            | 181t        |
| acgg            | 5               | 122t           | 1            | 218t        |
| acgt            | 8               | 69t            | 9            | 105t        |
| acta            | 5               | 122t           | 7            | 121t        |
| actc            | 9               | 60t            | 13           | 77t         |
| actg            | 1               | 192t           | 10           | 95t         |
| actt            | 6               | 101t           | 12           | 84t         |
| agaa            | 3               | 155t           | 1            | 218t        |
| agac            | 1               | 192t           | 3            | 181t        |
| agag            | 10              | 49t            | 0            | 241t        |
| agat            | 0               | 220t           | 0            | 241t        |
| agca            | 7               | 90t            | 1            | 218t        |
| agcc            | 5               | 122t           | 7            | 121t        |
| agcg            | 1               | 192t           | 4            | 164t        |
| agct            | 18              | 10t            | 3            | 181t        |
| agga            | 4               | 136t           | 0            | 241t        |
| aggc            | 6               | 101t           | 2            | 192t        |
| aggg            | 0               | 220t           | 1            | 218t        |
| aggt            | 8               | 69t            | 2            | 192t        |
| agta            | 10              | 49t            | 5            | 147t        |
| agtc            | 5               | 122t           | 5            | 147t        |
| agtg            | 11              | 40t            | 5            | 147t        |

Supplementary table 4. Tetranucleotides in the anti-RRM1+2 and anti-Bru aptamers

|      |    |      |    |      |
|------|----|------|----|------|
| agtt | 11 | 40t  | 10 | 95t  |
| ataa | 8  | 69t  | 9  | 105t |
| atac | 4  | 136t | 10 | 95t  |
| atag | 7  | 90t  | 4  | 164t |
| atat | 8  | 69t  | 32 | 37t  |
| atca | 27 | 2    | 11 | 90t  |
| atcc | 7  | 90t  | 18 | 66t  |
| atcg | 0  | 220t | 7  | 121t |
| atct | 11 | 40t  | 29 | 42t  |
| atga | 3  | 155t | 3  | 181t |
| atgc | 11 | 40t  | 10 | 95t  |
| atgg | 0  | 220t | 2  | 192t |
| atgt | 14 | 21t  | 24 | 52t  |
| atta | 11 | 40t  | 24 | 52t  |
| attc | 8  | 69t  | 26 | 49t  |
| attg | 1  | 192t | 39 | 26t  |
| attt | 14 | 21t  | 71 | 14   |
| caaa | 23 | 4    | 5  | 147t |
| caac | 2  | 172t | 13 | 77t  |
| caag | 8  | 69t  | 2  | 192t |
| caat | 6  | 101t | 20 | 60t  |
| caca | 6  | 101t | 5  | 147t |
| cacc | 7  | 90t  | 12 | 84t  |
| cacg | 6  | 101t | 4  | 164t |
| cact | 6  | 101t | 9  | 105t |
| caga | 0  | 220t | 4  | 164t |
| cagc | 8  | 69t  | 2  | 192t |
| cagg | 3  | 155t | 2  | 192t |
| cagt | 6  | 101t | 9  | 105t |
| cata | 16 | 15t  | 17 | 69t  |
| catc | 2  | 172t | 12 | 84t  |
| catg | 1  | 192t | 7  | 121t |
| catt | 13 | 29t  | 26 | 49t  |
| ccaa | 3  | 155t | 20 | 60t  |
| ccac | 4  | 136t | 7  | 121t |
| ccag | 4  | 136t | 6  | 133t |
| ccat | 7  | 90t  | 33 | 36   |
| ccca | 1  | 192t | 19 | 63t  |
| cccc | 0  | 220t | 9  | 105t |
| cccg | 0  | 220t | 6  | 133t |
| ccct | 1  | 192t | 28 | 45   |
| ccga | 0  | 220t | 5  | 147t |
| ccgc | 0  | 220t | 9  | 105t |
| ccgg | 4  | 136t | 2  | 192t |
| ccgt | 3  | 155t | 23 | 55t  |
| ccta | 1  | 192t | 27 | 46t  |
| cctc | 6  | 101t | 43 | 23t  |
| cctg | 9  | 60t  | 20 | 60t  |
| cctt | 2  | 172t | 48 | 21   |

Supplementary table 4. Tetranucleotides in the anti-RRM1+2 and anti-Bru aptamers

|      |    |      |    |      |
|------|----|------|----|------|
| cgaa | 2  | 172t | 1  | 218t |
| cgac | 4  | 136t | 4  | 164t |
| cgag | 3  | 155t | 1  | 218t |
| cgat | 2  | 172t | 7  | 121t |
| cgca | 3  | 155t | 5  | 147t |
| cgcc | 1  | 192t | 8  | 117t |
| cgcg | 1  | 192t | 1  | 218t |
| cgct | 1  | 192t | 7  | 121t |
| cgga | 3  | 155t | 1  | 218t |
| cggc | 0  | 220t | 4  | 164t |
| cggg | 0  | 220t | 0  | 241t |
| cggt | 7  | 90t  | 1  | 218t |
| cgta | 4  | 136t | 9  | 105t |
| cgtc | 1  | 192t | 22 | 58   |
| cgtg | 0  | 220t | 8  | 117t |
| cgtt | 6  | 101t | 24 | 52t  |
| ctaa | 4  | 136t | 12 | 84t  |
| ctac | 5  | 122t | 19 | 63t  |
| ctag | 2  | 172t | 2  | 192t |
| ctat | 4  | 136t | 43 | 23t  |
| ctca | 12 | 32t  | 16 | 72t  |
| ctcc | 4  | 136t | 30 | 40t  |
| ctcg | 7  | 90t  | 17 | 69t  |
| ctct | 14 | 21t  | 52 | 19   |
| ctga | 6  | 101t | 4  | 164t |
| ctgc | 8  | 69t  | 13 | 77t  |
| ctgg | 10 | 49t  | 2  | 192t |
| ctgt | 8  | 69t  | 50 | 20   |
| ctta | 10 | 49t  | 18 | 66t  |
| cttc | 14 | 21t  | 38 | 28t  |
| cttg | 2  | 172t | 34 | 35   |
| cttt | 8  | 69t  | 75 | 11   |
| gaaa | 7  | 90t  | 1  | 230  |
| gaac | 1  | 192t | 2  | 192t |
| gaag | 0  | 220t | 0  | 241t |
| gaat | 2  | 172t | 3  | 181t |
| gaca | 0  | 220t | 2  | 192t |
| gacc | 2  | 172t | 8  | 117t |
| gacg | 8  | 69t  | 2  | 192t |
| gact | 1  | 192t | 1  | 218t |
| gaga | 2  | 172t | 0  | 241t |
| gagc | 8  | 69t  | 4  | 164t |
| gagg | 5  | 122t | 2  | 192t |
| gagt | 10 | 49t  | 1  | 218t |
| gata | 1  | 192t | 1  | 218t |
| gatc | 12 | 32t  | 4  | 164t |
| gatg | 1  | 192t | 2  | 192t |
| gatt | 2  | 172t | 5  | 147t |
| gcaa | 14 | 21t  | 2  | 192t |

Supplementary table 4. Tetranucleotides in the anti-RRM1+2 and anti-Bru aptamers

|      |    |      |    |      |
|------|----|------|----|------|
| gcac | 0  | 220t | 5  | 147t |
| gcag | 3  | 155t | 2  | 192t |
| gcat | 6  | 101t | 7  | 121t |
| gcca | 6  | 101t | 5  | 147t |
| gccc | 3  | 155t | 9  | 105t |
| gccg | 1  | 192t | 1  | 218t |
| gcct | 8  | 69t  | 13 | 77t  |
| gcga | 1  | 192t | 0  | 241t |
| gcgc | 1  | 192t | 5  | 147t |
| gcgg | 0  | 220t | 1  | 218t |
| gcgt | 0  | 220t | 1  | 218t |
| gcta | 1  | 192t | 6  | 133t |
| gctc | 9  | 60t  | 6  | 133t |
| gctg | 6  | 101t | 0  | 241t |
| gctt | 11 | 40t  | 10 | 95t  |
| ggaa | 5  | 122t | 0  | 241t |
| ggac | 3  | 155t | 1  | 218t |
| ggag | 10 | 49t  | 1  | 218t |
| ggat | 8  | 69t  | 1  | 218t |
| ggca | 0  | 220t | 4  | 164t |
| ggcc | 0  | 220t | 2  | 192t |
| ggcg | 0  | 220t | 0  | 241t |
| ggct | 6  | 101t | 1  | 220  |
| ggga | 0  | 220t | 2  | 192t |
| gggc | 0  | 220t | 1  | 218t |
| gggg | 0  | 220t | 2  | 192t |
| gggt | 0  | 220t | 4  | 164t |
| ggta | 2  | 172t | 0  | 241t |
| ggtc | 8  | 69t  | 4  | 164t |
| ggtg | 3  | 155t | 0  | 241t |
| ggtt | 2  | 172t | 6  | 133t |
| gtaa | 3  | 155t | 12 | 84t  |
| gtac | 7  | 90t  | 10 | 95t  |
| gtag | 6  | 101t | 0  | 241t |
| gtat | 12 | 32t  | 23 | 55t  |
| gtca | 5  | 122t | 5  | 147t |
| gtcc | 0  | 220t | 79 | 10   |
| gtcg | 6  | 101t | 2  | 192t |
| gtct | 15 | 19t  | 81 | 9    |
| gtga | 4  | 136t | 3  | 181t |
| gtgc | 2  | 172t | 6  | 133t |
| gtgg | 0  | 220t | 4  | 164t |
| gtgt | 11 | 40t  | 39 | 26t  |
| gtta | 13 | 29t  | 21 | 59   |
| gttc | 10 | 49t  | 13 | 77t  |
| gttg | 8  | 69t  | 15 | 74t  |
| gttt | 5  | 122t | 94 | 6    |
| taaa | 8  | 69t  | 11 | 90t  |
| taac | 0  | 220t | 10 | 95t  |

Supplementary table 4. Tetranucleotides in the anti-RRM1+2 and anti-Bru aptamers

|      |    |      |     |      |
|------|----|------|-----|------|
| taag | 4  | 136t | 13  | 77t  |
| taat | 6  | 101t | 29  | 42t  |
| taca | 5  | 122t | 9   | 105t |
| tacc | 4  | 136t | 19  | 63t  |
| tacg | 8  | 69t  | 5   | 147t |
| tact | 4  | 136t | 27  | 46t  |
| taga | 2  | 172t | 2   | 192t |
| tagc | 9  | 60t  | 5   | 147t |
| tagg | 4  | 136t | 0   | 241t |
| tagt | 12 | 32t  | 9   | 105t |
| tata | 11 | 40t  | 30  | 40t  |
| tatc | 22 | 5    | 35  | 32t  |
| tatg | 24 | 3    | 23  | 55t  |
| tatt | 9  | 60t  | 91  | 8    |
| tcaa | 20 | 6t   | 15  | 74t  |
| tcac | 20 | 6t   | 11  | 90t  |
| tcag | 9  | 60t  | 7   | 121t |
| tcat | 12 | 32t  | 17  | 69t  |
| tcca | 8  | 69t  | 36  | 31   |
| tccc | 2  | 172t | 37  | 30   |
| tccg | 1  | 192t | 27  | 46t  |
| tcct | 1  | 192t | 74  | 12t  |
| tcga | 5  | 122t | 6   | 133t |
| tcgc | 1  | 192t | 6   | 133t |
| tcgg | 7  | 90t  | 2   | 192t |
| tcgt | 0  | 220t | 32  | 37t  |
| tcta | 16 | 15t  | 38  | 28t  |
| tctc | 11 | 40t  | 60  | 17   |
| tctg | 16 | 15t  | 40  | 25   |
| tctt | 15 | 19t  | 92  | 7    |
| tgaa | 0  | 220t | 4   | 164t |
| tgac | 3  | 155t | 5   | 147t |
| tgag | 4  | 136t | 4   | 164t |
| tgat | 6  | 101t | 4   | 164t |
| tgca | 14 | 21t  | 6   | 133t |
| tgcc | 12 | 32t  | 11  | 90t  |
| tgcg | 0  | 220t | 2   | 192t |
| tgct | 2  | 172t | 13  | 77t  |
| tgga | 19 | 8t   | 1   | 218t |
| ggc  | 0  | 220t | 0   | 241t |
| ggg  | 0  | 220t | 6   | 133t |
| gggt | 0  | 220t | 3   | 181t |
| tgta | 14 | 21t  | 35  | 32t  |
| gtc  | 12 | 32t  | 137 | 3    |
| gtg  | 2  | 172t | 32  | 37t  |
| gtt  | 17 | 12t  | 103 | 5    |
| ttaa | 2  | 172t | 29  | 42t  |
| ttac | 5  | 122t | 16  | 72t  |
| ttag | 14 | 21t  | 10  | 95t  |

Supplementary table 4. Tetranucleotides in the anti-RRM1+2 and anti-Bru aptamers

|      |    |      |     |      |
|------|----|------|-----|------|
| ttat | 37 | 1    | 74  | 12t  |
| ttca | 17 | 12t  | 10  | 95t  |
| ttcc | 1  | 192t | 47  | 22   |
| ttcg | 0  | 220t | 18  | 66t  |
| ttct | 19 | 8t   | 66  | 15   |
| ttga | 0  | 220t | 7   | 121t |
| ttgc | 4  | 136t | 5   | 147t |
| ttgg | 3  | 155t | 3   | 181t |
| ttgt | 13 | 29t  | 196 | 1    |
| ttta | 16 | 15t  | 57  | 18   |
| tttc | 5  | 122t | 64  | 16   |
| tttg | 9  | 60t  | 124 | 4    |
| tttt | 10 | 49t  | 152 | 2    |

Count: number of times the sequence is present in the sequenced aptamers.  
 Rank: 1 indicates the most frequent tetranucleotide. Ties are indicated with a t.

Supplementary Table 5. Structural features of RNAs used for binding assays.

| Binding site <sup>a</sup> | $\Delta G^b$ | copy number <sup>c</sup> | size | # of base pairs in binding site |     |     |
|---------------------------|--------------|--------------------------|------|---------------------------------|-----|-----|
|                           |              |                          |      | G-C                             | A-U | G-U |
| UGUUUUUAUAUGU             | -19.9        | 1                        | 12   | 1                               | 4   | 3   |
|                           |              | 2                        |      | 0                               | 5   | 4   |
|                           |              | 3                        |      | 1                               | 6   | 4   |
|                           |              | 4                        |      | 1                               | 4   | 3   |
| CAAUUUUUAUAUGU            | -20.5        | 1                        | 13   | 1                               | 6   | 3   |
|                           |              | 2                        |      | 1                               | 8   | 2   |
|                           |              | 3                        |      | 1                               | 6   | 1   |
|                           |              | 4                        |      | 1                               | 7   | 3   |
| UGUUUGUAGU                | -25.6        | 1                        | 10   | 2                               | 2   | 0   |
|                           |              | 2                        |      | 1                               | 3   | 2   |
|                           |              | 3                        |      | 2                               | 4   | 0   |
|                           |              | 4                        |      | 2                               | 3   | 1   |
| UUGUCC                    | -24.0        | 1                        | 6    | 3                               | 1   | 1   |
|                           |              | 2                        |      | 1                               | 0   | 1   |
|                           |              | 3                        |      | 0                               | 0   | 0   |
|                           |              | 4                        |      | 3                               | 3   | 0   |
| UAAAGUCUUCUA              | -24.3        | 1                        | 12   | 1                               | 6   | 0   |
|                           |              | 2                        |      | 0                               | 5   | 0   |
|                           |              | 3                        |      | 2                               | 7   | 1   |
|                           |              | 4                        |      | 1                               | 5   | 1   |
| UCAAUUGCAGU               | -36.1        | 1                        | 11   | 3                               | 6   | 2   |
|                           |              | 2                        |      | 3                               | 6   | 2   |
|                           |              | 3                        |      | 3                               | 5   | 2   |
|                           |              | 4                        |      | 3                               | 5   | 2   |

<sup>a</sup> The binding site that is present in four copies in the RNA used for binding assays (and inserted into a reporter transgene for in vivo assays).

<sup>b</sup> Predicted  $\Delta G$  for folding of entire RNA.

<sup>c</sup> Copy number refers to position of individual binding sites within the RNA.



Supplementary Figure 1. Monitoring progression of in vitro selections.

Each graph shows the results of filter binding assays with RNAs from the indicated round of selection with the indicated protein. Relative binding indicates the percentage of input RNA bound.

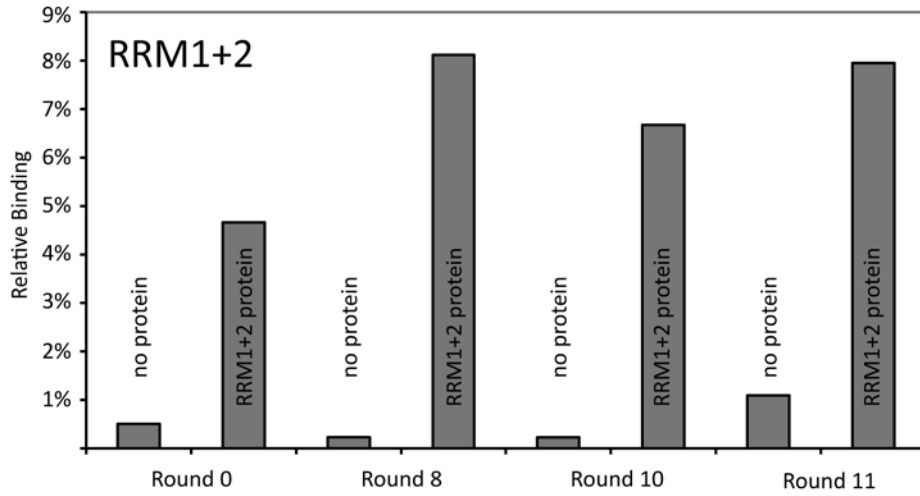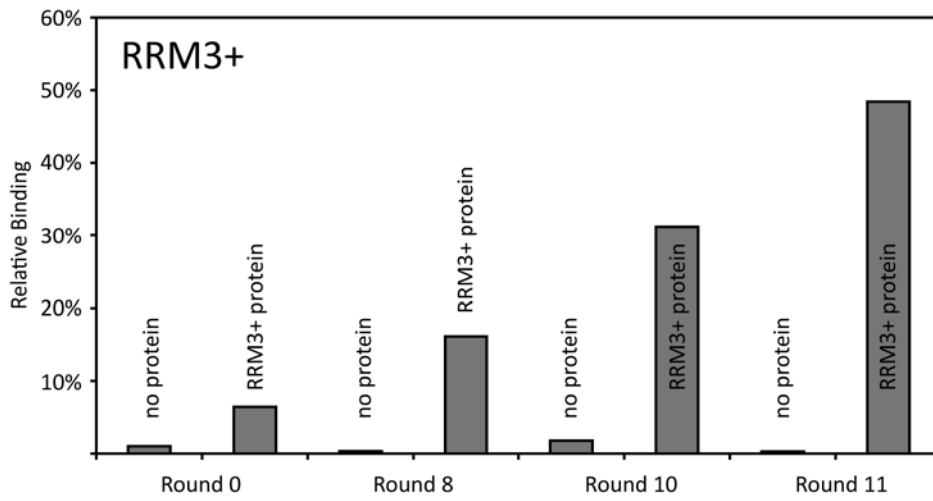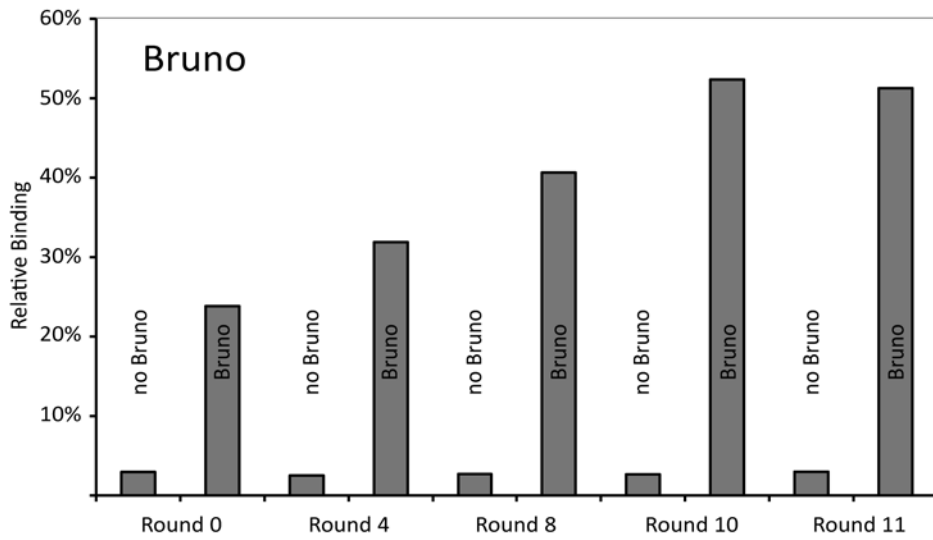

Supplement: rna0806_1047SD1.pdf [file rna0806_1047SD1.pdf]
